# Supplementary material for: Kazak mitochondrial genomes provide insights into the human population history of Central Eurasia
Source: PLoS One. 2022 Nov 29;17(11):e0277771. doi: 10.1371/journal.pone.0277771 (PMC9707748; doi:10.1371/journal.pone.0277771)
Supplement: S7 Table — Ethnicity and GenBank ID information of the samples can be found in S3 and S4 Tables. (XLSX) [file pone.0277771.s009.xlsx]

## Sheet: Sheet 1
	Supplementary Table 8. Sample ID list of Mitochondrial Genomes (N=2074) from the Central Eurasia (N=1954) and Jetisuu (N=120, excluding pseudo-mtGenomes) that were used for the mtGenome Fst value based PCA Analysis. Ethnicity and GenBank ID Information of the samples can be found in S3-4 Tables.
	Count	Sample ID
	1	AL101
	2	AL102
	3	AL103
	4	AL104
	5	AL105
	6	AL106
	7	AL107
	8	AL108
	9	AL109
	10	AL110
	11	AL111
	12	AL112
	13	AL113
	14	AL114
	15	AL115
	16	AL116
	17	AL117
	18	AL118
	19	AL119
	20	AL120
	21	Alt116_MD14
	22	Alt121_MD10
	23	Alt123_MD14
	24	Alt124_MD12
	25	Alt130_MD10
	26	Alt134_MD14
	27	Alt135_MD14
	28	Alt136_MD10
	29	Alt139_MD10
	30	Alt141_MD14
	31	Alt145_MD07
	32	Alt148_MD10
	33	Alt150_MD10
	34	Alt157_MD14
	35	Alt158_MD12
	36	Alt159_MD14
	37	Alt16_MD07
	38	Alt163_MD07
	39	Alt164_MD12
	40	Alt165_MD10
	41	Alt170_MD10
	42	Alt174_MD10
	43	Alt175_MD12
	44	Alt178_MD07
	45	Alt183_MD14
	46	Alt184_MD10
	47	Alt186_MD10
	48	Alt193_MD10
	49	Alt194_MD07
	50	Alt196_MD12
	51	Alt198_MD14
	52	Alt201_MD14
	53	Alt202_MD10
	54	Alt208_MD07
	55	Alt33_MD12
	56	Bur1_MD17
	57	Bur10_MD17
	58	Bur11_MD14
	59	Bur13_MD14
	60	Bur18_MD14
	61	Bur2_MD14
	62	Bur21_MD17
	63	Bur22_MD17
	64	Bur23_MD17
	65	Bur24_MD17
	66	Bur25_MD17
	67	Bur26_MD17
	68	Bur27_MD17
	69	Bur28_MD17
	70	Bur29_MD17
	71	Bur3_MD17
	72	Bur301_MD12
	73	Bur305_MD10
	74	Bur308_MD10
	75	Bur31_MD14
	76	Bur311_MD07
	77	Bur312_MD07
	78	Bur313_MD10
	79	Bur318_MD10
	80	Bur324_MD07
	81	Bur325_MD10
	82	Bur33_MD14
	83	Bur334_MD07
	84	Bur335_MD10
	85	Bur336_MD12
	86	Bur338_MD10
	87	Bur339_MD10
	88	Bur344_MD10
	89	Bur345_MD07
	90	Bur346_MD10
	91	Bur349_MD10
	92	Bur350_MD10
	93	Bur355_MD10
	94	Bur360_MD10
	95	Bur361_MD10
	96	Bur362_MD14
	97	Bur363_MD07
	98	Bur364_MD10
	99	Bur365_MD07
	100	Bur369_MD10
	101	Bur370_MD10
	102	Bur375_MD14
	103	Bur377_MD12
	104	Bur379_MD10
	105	Bur383_MD12
	106	Bur388_MD14
	107	Bur389_MD12
	108	Bur390_MD07
	109	Bur393_MD07
	110	Bur397_MD07
	111	Bur398_MD10
	112	Bur4_MD14
	113	Bur402_MD10
	114	Bur405_MD07
	115	Bur406_MD07
	116	Bur408_MD12
	117	Bur411_MD10
	118	Bur412_MD07
	119	Bur414_MD14
	120	Bur416_MD10
	121	Bur417_MD12
	122	Bur420_MD14
	123	Bur423_MD07
	124	Bur424_MD14
	125	Bur428_MD14
	126	Bur429_MD14
	127	Bur430_MD14
	128	Bur433_MD12
	129	Bur435_MD14
	130	Bur437_MD14
	131	Bur438_MD10
	132	Bur439_MD14
	133	Bur441_MD10
	134	Bur442_MD07
	135	Bur444_MD12
	136	Bur446_MD10
	137	Bur450_MD10
	138	Bur5_MD17
	139	Bur50_MD14
	140	Bur501_MD10
	141	Bur502_MD10
	142	Bur503_MD14
	143	Bur503_MD17
	144	Bur504_MD10
	145	Bur505_MD17
	146	Bur507_MD17
	147	Bur508_MD17
	148	Bur509_MD17
	149	Bur51_MD17
	150	Bur510_MD17
	151	Bur511_MD10
	152	Bur512_MD17
	153	Bur513_MD10
	154	Bur514_MD17
	155	Bur515_MD10
	156	Bur516_MD14
	157	Bur517_MD17
	158	Bur518_MD10
	159	Bur519_MD17
	160	Bur52_MD17
	161	Bur520_MD17
	162	Bur521_MD10
	163	Bur523_MD07
	164	Bur524_MD10
	165	Bur525_MD17
	166	Bur526_MD10
	167	Bur527_MD17
	168	Bur528_MD10
	169	Bur529_MD14
	170	Bur530_MD17
	171	Bur532_MD10
	172	Bur534_MD10
	173	Bur535_MD14
	174	Bur536_MD17
	175	Bur538_MD17
	176	Bur539_MD17
	177	Bur54_MD17
	178	Bur540_MD10
	179	Bur541_MD17
	180	Bur543_MD14
	181	Bur544_MD17
	182	Bur545_MD17
	183	Bur546_MD17
	184	Bur548_MD17
	185	Bur549_MD17
	186	Bur55_MD14
	187	Bur550_MD17
	188	Bur551_MD17
	189	Bur552_MD07
	190	Bur553_MD17
	191	Bur554_MD10
	192	Bur556_MD17
	193	Bur558_MD10
	194	Bur559_MD17
	195	Bur56_MD17
	196	Bur560_MD14
	197	Bur561_MD07
	198	Bur562_MD17
	199	Bur563_MD17
	200	Bur564_MD17
	201	Bur565_MD17
	202	Bur566_MD17
	203	Bur567_MD17
	204	Bur568_MD07
	205	Bur569_MD10
	206	Bur57_MD14
	207	Bur570_MD12
	208	Bur571_MD10
	209	Bur572_MD17
	210	Bur573_MD10
	211	Bur574_MD17
	212	Bur575_MD07
	213	Bur576_MD17
	214	Bur577_MD17
	215	Bur578_MD10
	216	Bur579_MD17
	217	Bur58_MD17
	218	Bur580_MD14
	219	Bur581_MD14
	220	Bur582_MD17
	221	Bur583_MD17
	222	Bur584_MD17
	223	Bur585_MD14
	224	Bur586_MD14
	225	Bur587_MD14
	226	Bur588_MD17
	227	Bur589_MD14
	228	Bur590_MD14
	229	Bur591_MD17
	230	Bur592_MD14
	231	Bur593_MD17
	232	Bur594_MD17
	233	Bur595_MD17
	234	Bur596_MD14
	235	Bur597_MD17
	236	Bur598_MD17
	237	Bur599_MD10
	238	Bur6_MD14
	239	Bur60_MD17
	240	Bur600_MD17
	241	Bur601_MD14
	242	Bur602_MD17
	243	Bur603_MD17
	244	Bur604_MD12
	245	Bur605_MD14
	246	Bur606_MD17
	247	Bur607_MD14
	248	Bur608_MD07
	249	Bur609_MD17
	250	Bur610_MD10
	251	Bur611_MD17
	252	Bur612_MD14
	253	Bur613_MD10
	254	Bur614_MD17
	255	Bur615_MD17
	256	Bur616_MD17
	257	Bur618_MD07
	258	Bur619_MD17
	259	Bur620_MD17
	260	Bur621_MD07
	261	Bur623_MD12
	262	Bur624_MD17
	263	Bur625_MD17
	264	Bur627_MD07
	265	Bur628_MD14
	266	Bur629_MD17
	267	Bur631_MD17
	268	Bur632_MD17
	269	Bur633_MD17
	270	Bur635_MD17
	271	Bur636_MD07
	272	Bur637_MD17
	273	Bur638_MD17
	274	Bur639_MD10
	275	Bur64_MD14
	276	Bur640_MD10
	277	Bur641_MD10
	278	Bur643_MD07
	279	Bur644_MD17
	280	Bur646_MD07
	281	Bur647_MD14
	282	Bur648_MD14
	283	Bur649_MD17
	284	Bur7_MD17
	285	Bur8_MD14
	286	Bur9_MD17
	287	HuB107_BM18
	288	HuB164_BM18
	289	HuD1_BM18
	290	HuD10_BM18
	291	HuD11_BM18
	292	HuD12_BM18
	293	HuD13_BM18
	294	HuD14_BM18
	295	HuD15_BM18
	296	HuD16_BM18
	297	HuD17_BM18
	298	HuD18_BM18
	299	HuD19_BM18
	300	HuD2_BM18
	301	HuD20_BM18
	302	HuD21_BM18
	303	HuD22_BM18
	304	HuD23_BM18
	305	HuD24_BM18
	306	HuD25_BM18
	307	HuD26_BM18
	308	HuD27_BM18
	309	HuD28_BM18
	310	HuD29_BM18
	311	HuD3_BM18
	312	HuD30_BM18
	313	HuD31_BM18
	314	HuD32_BM18
	315	HuD33_BM18
	316	HuD34_BM18
	317	HuD35_BM18
	318	HuD36_BM18
	319	HuD37_BM18
	320	HuD38_BM18
	321	HuD39_BM18
	322	HuD4_BM18
	323	HuD40_BM18
	324	HuD5_BM18
	325	HuD6_BM18
	326	HuD7_BM18
	327	HuD8_BM18
	328	HuD9_BM18
	329	HuG42_BM18
	330	HuG84_BM18
	331	HuK367_BM18
	332	HuKA120_BM18
	333	HuKA187_BM18
	334	HuP522_BM18
	335	HuP53_BM18
	336	HuP55_BM18
	337	HuP56_BM18
	338	HuP574_BM18
	339	HuP58_BM18
	340	HuP587_BM18
	341	HuP709_BM18
	342	HuS1_BM18
	343	HuS10_BM18
	344	HuS11_BM18
	345	HuS12_BM18
	346	HuS13_BM18
	347	HuS14_BM18
	348	HuS15_BM18
	349	HuS16_BM18
	350	HuS17_BM18
	351	HuS18_BM18
	352	HuS19_BM18
	353	HuS2_BM18
	354	HuS20_BM18
	355	HuS21_BM18
	356	HuS22_BM18
	357	HuS23_BM18
	358	HuS24_BM18
	359	HuS25_BM18
	360	HuS26_BM18
	361	HuS27_BM18
	362	HuS28_BM18
	363	HuS29_BM18
	364	HuS3_BM18
	365	HuS30_BM18
	366	HuS31_BM18
	367	HuS32_BM18
	368	HuS33_BM18
	369	HuS34_BM18
	370	HuS35_BM18
	371	HuS36_BM18
	372	HuS37_BM18
	373	HuS38_BM18
	374	HuS39_BM18
	375	HuS4_BM18
	376	HuS40_BM18
	377	HuS5_BM18
	378	HuS6_BM18
	379	HuS7_BM18
	380	HuS8_BM18
	381	HuS9_BM18
	382	JA101
	383	JA102
	384	JA103
	385	JA104
	386	JA105
	387	JA106
	388	JA107
	389	JA108
	390	JA109
	391	JA110
	392	JA111
	393	JA112
	394	JA113
	395	JA114
	396	JA115
	397	JA116
	398	JA117
	399	JA118
	400	JA119
	401	JA120
	402	JA121
	403	JA122
	404	JA123
	405	JA124
	406	JA125
	407	JA126
	408	JA127
	409	JA128
	410	JA129
	411	JA130
	412	JA131
	413	JA132
	414	JA133
	415	JA134
	416	JA135
	417	JA136
	418	JA137
	419	JA138
	420	JA139
	421	JA140
	422	JA141
	423	JA142
	424	JA143
	425	JA144
	426	JA145
	427	JA146
	428	JA147
	429	JA148
	430	JA149
	431	JA150
	432	JA151
	433	Kir101_PM18
	434	Kir102_PM18
	435	Kir103_PM18
	436	Kir105_PM18
	437	Kir106_PM18
	438	Kir107_PM18
	439	Kir108_PM18
	440	Kir109_PM18
	441	Kir110_PM18
	442	Kir111_PM18
	443	Kir112_PM18
	444	Kir114_PM18
	445	Kir115_PM18
	446	Kir119_PM18
	447	Kir120_PM18
	448	Kir121_PM18
	449	Kir122_PM18
	450	Kir123_PM18
	451	Kir124_PM18
	452	Kir125_PM18
	453	Kir127_PM18
	454	Kir128_PM18
	455	Kir129_PM18
	456	Kir130_PM18
	457	Kir131_PM18
	458	Kir132_PM18
	459	Kir134_PM18
	460	Kir135_PM18
	461	Kir136_PM18
	462	Kir137_PM18
	463	Kir138_PM18
	464	Kir139_PM18
	465	Kir141_PM18
	466	Kir142_PM18
	467	Kir143_PM18
	468	Kir146_PM18
	469	Kir149_PM18
	470	Kir150_PM18
	471	Kir151_PM18
	472	Kir152_PM18
	473	Kir153_PM18
	474	Kir154_PM18
	475	Kir157_PM18
	476	Kir158_PM18
	477	Kir160_PM18
	478	Kir161_PM18
	479	Kir162_PM18
	480	Kir164_PM18
	481	Kir165_PM18
	482	Kir166_PM18
	483	Kir169_PM18
	484	Kir171_PM18
	485	Kir172_PM18
	486	Kir175_PM18
	487	Kir176_PM18
	488	Kir178_PM18
	489	Kir180_PM18
	490	Kir181_PM18
	491	Kir184_PM18
	492	Kir186_PM18
	493	Kir188_PM18
	494	Kir189_PM18
	495	Kir190_PM18
	496	Kir191_PM18
	497	Kir193_PM18
	498	Kir194_PM18
	499	Kir195_PM18
	500	Kir199_PM18
	501	Kir200_PM18
	502	Kir201_PM18
	503	Kir202_PM18
	504	Kir203_PM18
	505	Kir204_PM18
	506	Kir205_PM18
	507	Kir207_PM18
	508	Kir208_PM18
	509	Kir209_PM18
	510	Kir211_PM18
	511	Kir212_PM18
	512	Kir213_PM18
	513	Kir214_PM18
	514	Kir215_PM18
	515	Kir216_PM18
	516	Kir217_PM18
	517	Kir218_PM18
	518	Kir219_PM18
	519	Kir220_PM18
	520	Kir221_PM18
	521	Kir222_PM18
	522	Kir223_PM18
	523	Kir224_PM18
	524	Kir225_PM18
	525	Kir226_PM18
	526	Kir227_PM18
	527	Kir228_PM18
	528	Kir229_PM18
	529	Kir230_PM18
	530	Kir231_PM18
	531	Kir232_PM18
	532	Kir233_PM18
	533	Kir234_PM18
	534	Kir235_PM18
	535	Kir236_PM18
	536	Kir237_PM18
	537	Kir238_PM18
	538	Kir239_PM18
	539	Kir240_PM18
	540	Kir241_PM18
	541	Kir242_PM18
	542	Kir243_PM18
	543	Kir244_PM18
	544	Kir245_PM18
	545	Kir246_PM18
	546	Kir247_PM18
	547	Kir248_PM18
	548	Kir249_PM18
	549	Kir250_PM18
	550	Kir251_PM18
	551	Kir252_PM18
	552	Kir253_PM18
	553	Kir254_PM18
	554	Kir255_PM18
	555	Kir256_PM18
	556	Kir257_PM18
	557	Kir258_PM18
	558	KZ101
	559	KZ102
	560	KZ103
	561	KZ104
	562	Rus0_FTDNA
	563	Rus1_FTDNA
	564	Rus10_FTDNA
	565	Rus10_MM13
	566	Rus103_BM08
	567	Rus104_MM13
	568	Rus11_FTDNA
	569	Rus12_BM08
	570	Rus12_FTDNA
	571	Rus120_MM13
	572	Rus13_FTDNA
	573	Rus14_FTDNA
	574	Rus15_FTDNA
	575	Rus16_FTDNA
	576	Rus161_BM08
	577	Rus165_BM08
	578	Rus17_FTDNA
	579	Rus17_MM13
	580	Rus170_BM08
	581	Rus18_FTDNA
	582	Rus19_FTDNA
	583	Rus2_FTDNA
	584	Rus20_FTDNA
	585	Rus20_MM13
	586	Rus21_FTDNA
	587	Rus21_MM13
	588	Rus2114_BM08
	589	Rus22_FTDNA
	590	Rus23_FTDNA
	591	Rus24_FTDNA
	592	Rus25_FTDNA
	593	Rus259_BM08
	594	Rus26_BM08
	595	Rus26_FTDNA
	596	Rus27_FTDNA
	597	Rus28_FTDNA
	598	Rus29_FTDNA
	599	Rus3_FTDNA
	600	Rus30_FTDNA
	601	Rus31_FTDNA
	602	Rus3129_BM08
	603	Rus313_BM08
	604	Rus32_FTDNA
	605	Rus33_FTDNA
	606	Rus34_FTDNA
	607	Rus34_MM13
	608	Rus35_FTDNA
	609	Rus36_FTDNA
	610	Rus37_FTDNA
	611	Rus38_FTDNA
	612	Rus39_FTDNA
	613	Rus4_FTDNA
	614	Rus40_FTDNA
	615	Rus41_FTDNA
	616	Rus41_MM13
	617	Rus42_FTDNA
	618	Rus42_MM13
	619	Rus43_FTDNA
	620	Rus44_FTDNA
	621	Rus45_FTDNA
	622	Rus46_FTDNA
	623	Rus47_FTDNA
	624	Rus474_BM08
	625	Rus48_FTDNA
	626	Rus488_BM08
	627	Rus49_FTDNA
	628	Rus5_FTDNA
	629	Rus50_BM08
	630	Rus50_FTDNA
	631	Rus51_FTDNA
	632	Rus52_FTDNA
	633	Rus53_FTDNA
	634	Rus54_FTDNA
	635	Rus54_MM13
	636	Rus55_FTDNA
	637	Rus56_FTDNA
	638	Rus56_MM13
	639	Rus57_FTDNA
	640	Rus58_FTDNA
	641	Rus59_FTDNA
	642	Rus6_FTDNA
	643	Rus60_FTDNA
	644	Rus63_MM13
	645	Rus64_MM13
	646	Rus67_MM13
	647	Rus6II3_BM08
	648	Rus7_FTDNA
	649	Rus75_MM13
	650	Rus8_FTDNA
	651	Rus81_BM08
	652	Rus81_MM13
	653	Rus829_BM08
	654	Rus866_BM08
	655	Rus871_BM08
	656	Rus88_MM13
	657	Rus9_FTDNA
	658	Rus9_MM13
	659	Rus96_MM13
	660	SH101
	661	SH102
	662	SH103
	663	SH104
	664	SH105
	665	SH106
	666	SH107
	667	SH108
	668	SH109
	669	SH110
	670	SH111
	671	SH112
	672	SH113
	673	SH114
	674	SH115
	675	SH116
	676	SH117
	677	SH118
	678	SH119
	679	SH120
	680	SH121
	681	SH122
	682	SH123
	683	SH124
	684	SH125
	685	SH126
	686	SH127
	687	SH128
	688	SH129
	689	SH130
	690	SH131
	691	SH132
	692	Shr002_KL13
	693	Shr003_KL13
	694	Shr004_KL13
	695	Shr005_KL13
	696	Shr006_KL13
	697	Shr008_KL13
	698	Shr009_KL13
	699	Shr012_KL13
	700	Shr013_KL13
	701	Shr014_KL13
	702	Shr015_KL13
	703	Shr017_KL13
	704	Shr020_KL13
	705	Shr023_KL13
	706	Shr024_KL13
	707	Shr026_KL13
	708	Shr029_KL13
	709	Shr031_KL13
	710	Shr035_KL13
	711	Shr036_KL13
	712	Shr039_KL13
	713	Shr042_KL13
	714	Shr043_KL13
	715	Shr047_KL13
	716	Shr048_KL13
	717	Shr049_KL13
	718	Shr050_KL13
	719	Shr051_KL13
	720	Shr056_KL13
	721	Shr057_KL13
	722	Shr058_KL13
	723	Shr059_KL13
	724	Shr062_KL13
	725	Shr072_KL13
	726	Shr073_KL13
	727	Shr075_KL13
	728	Shr076_KL13
	729	Shr077_KL13
	730	Shr098_KL13
	731	Shr100_KL13
	732	Shr101_KL13
	733	Shr102_KL13
	734	Shr103_KL13
	735	Shr104_KL13
	736	Shr108_KL13
	737	Shr110_KL13
	738	Shr111_KL13
	739	Shr113_KL13
	740	Shr114_KL13
	741	Shr115_KL13
	742	Shr116_KL13
	743	Shr124_KL13
	744	Shr125_KL13
	745	Shr126_KL13
	746	Shr129_KL13
	747	Shr130_KL13
	748	Shr131_KL13
	749	Shr139_KL13
	750	Shr145_KL13
	751	Shr149_KL13
	752	Shr150_KL13
	753	Shr151_KL13
	754	Shr152_KL13
	755	Shr158_KL13
	756	Shr160_KL13
	757	Shr161_KL13
	758	Shr162_KL13
	759	Shr163_KL13
	760	Shr164_KL13
	761	Shr166_KL13
	762	Shr170_KL13
	763	Shr171_KL13
	764	Shr174_KL13
	765	Shr180_KL13
	766	Shr184_KL13
	767	Shr185_KL13
	768	SU101
	769	SU102
	770	SU103
	771	SU104
	772	SU105
	773	SU106
	774	SU107
	775	SU108
	776	SU109
	777	SU110
	778	SU111
	779	SU112
	780	SU113
	781	Taj10_PM18
	782	Taj101_PM18
	783	Taj102_PM18
	784	Taj106_PM18
	785	Taj107_PM18
	786	Taj108_PM18
	787	Taj109_PM18
	788	Taj110_PM18
	789	Taj111_PM18
	790	Taj112_PM18
	791	Taj113_PM18
	792	Taj12_PM18
	793	Taj125_PM18
	794	Taj126_PM18
	795	Taj127_PM18
	796	Taj128_PM18
	797	Taj129_PM18
	798	Taj13_PM18
	799	Taj130_PM18
	800	Taj131_PM18
	801	Taj132_PM18
	802	Taj133_PM18
	803	Taj134_PM18
	804	Taj136_PM18
	805	Taj138_PM18
	806	Taj139_PM18
	807	Taj140_PM18
	808	Taj141_PM18
	809	Taj142_PM18
	810	Taj143_PM18
	811	Taj144_PM18
	812	Taj145_PM18
	813	Taj146_PM18
	814	Taj147_PM18
	815	Taj148_PM18
	816	Taj149_PM18
	817	Taj15_PM18
	818	Taj150_PM18
	819	Taj151_PM18
	820	Taj152_PM18
	821	Taj153_PM18
	822	Taj154_PM18
	823	Taj156_PM18
	824	Taj157_PM18
	825	Taj158_PM18
	826	Taj159_PM18
	827	Taj160_PM18
	828	Taj162_PM18
	829	Taj163_PM18
	830	Taj165_PM18
	831	Taj167_PM18
	832	Taj168_PM18
	833	Taj17_PM18
	834	Taj170_PM18
	835	Taj172_PM18
	836	Taj173_PM18
	837	Taj174_PM18
	838	Taj176_PM18
	839	Taj177_PM18
	840	Taj178_PM18
	841	Taj180_PM18
	842	Taj181_PM18
	843	Taj182_PM18
	844	Taj183_PM18
	845	Taj185_PM18
	846	Taj186_PM18
	847	Taj187_PM18
	848	Taj188_PM18
	849	Taj189_PM18
	850	Taj190_PM18
	851	Taj191_PM18
	852	Taj192_PM18
	853	Taj193_PM18
	854	Taj194_PM18
	855	Taj195_PM18
	856	Taj196_PM18
	857	Taj197_PM18
	858	Taj198_PM18
	859	Taj199_PM18
	860	Taj20_PM18
	861	Taj200_PM18
	862	Taj201_PM18
	863	Taj202_PM18
	864	Taj203_PM18
	865	Taj204_PM18
	866	Taj205_PM18
	867	Taj206_PM18
	868	Taj207_PM18
	869	Taj208_PM18
	870	Taj209_PM18
	871	Taj21_PM18
	872	Taj210_PM18
	873	Taj211_PM18
	874	Taj212_PM18
	875	Taj213_PM18
	876	Taj214_PM18
	877	Taj215_PM18
	878	Taj216_PM18
	879	Taj217_PM18
	880	Taj219_PM18
	881	Taj221_PM18
	882	Taj222_PM18
	883	Taj223_PM18
	884	Taj224_PM18
	885	Taj225_PM18
	886	Taj226_PM18
	887	Taj229_PM18
	888	Taj230_PM18
	889	Taj231_PM18
	890	Taj232_PM18
	891	Taj233_PM18
	892	Taj234_PM18
	893	Taj235_PM18
	894	Taj238_PM18
	895	Taj239_PM18
	896	Taj24_PM18
	897	Taj240_PM18
	898	Taj241_PM18
	899	Taj242_PM18
	900	Taj243_PM18
	901	Taj244_PM18
	902	Taj245_PM18
	903	Taj246_PM18
	904	Taj247_PM18
	905	Taj248_PM18
	906	Taj249_PM18
	907	Taj25_PM18
	908	Taj250_PM18
	909	Taj251_PM18
	910	Taj253_PM18
	911	Taj254_PM18
	912	Taj256_PM18
	913	Taj257_PM18
	914	Taj258_PM18
	915	Taj259_PM18
	916	Taj26_PM18
	917	Taj260_PM18
	918	Taj261_PM18
	919	Taj264_PM18
	920	Taj265_PM18
	921	Taj266_PM18
	922	Taj267_PM18
	923	Taj268_PM18
	924	Taj269_PM18
	925	Taj270_PM18
	926	Taj271_PM18
	927	Taj272_PM18
	928	Taj273_PM18
	929	Taj276_PM18
	930	Taj277_PM18
	931	Taj278_PM18
	932	Taj279_PM18
	933	Taj280_PM18
	934	Taj281_PM18
	935	Taj282_PM18
	936	Taj285_PM18
	937	Taj286_PM18
	938	Taj287_PM18
	939	Taj288_PM18
	940	Taj289_PM18
	941	Taj290_PM18
	942	Taj291_PM18
	943	Taj292_PM18
	944	Taj293_PM18
	945	Taj294_PM18
	946	Taj295_PM18
	947	Taj296_PM18
	948	Taj297_PM18
	949	Taj298_PM18
	950	Taj299_PM18
	951	Taj300_PM18
	952	Taj301_PM18
	953	Taj302_PM18
	954	Taj303_PM18
	955	Taj304_PM18
	956	Taj305_PM18
	957	Taj306_PM18
	958	Taj307_PM18
	959	Taj308_PM18
	960	Taj309_PM18
	961	Taj310_PM18
	962	Taj311_PM18
	963	Taj312_PM18
	964	Taj313_PM18
	965	Taj314_PM18
	966	Taj315_PM18
	967	Taj316_PM18
	968	Taj317_PM18
	969	Taj318_PM18
	970	Taj319_PM18
	971	Taj320_PM18
	972	Taj321_PM18
	973	Taj322_PM18
	974	Taj323_PM18
	975	Taj324_PM18
	976	Taj325_PM18
	977	Taj326_PM18
	978	Taj35_PM18
	979	Taj36_PM18
	980	Taj37_PM18
	981	Taj38_PM18
	982	Taj39_PM18
	983	Taj52_PM18
	984	Taj57_PM18
	985	Taj58_PM18
	986	Taj59_PM18
	987	Taj6_PM18
	988	Taj60_PM18
	989	Taj61_PM18
	990	Taj62_PM18
	991	Taj63_PM18
	992	Taj64_PM18
	993	Taj65_PM18
	994	Taj66_PM18
	995	Taj67_PM18
	996	Taj68_PM18
	997	Taj69_PM18
	998	Taj7_PM18
	999	Taj8_PM18
	1000	Taj84_PM18
	1001	Taj9_PM18
	1002	Taj96_PM18
	1003	Taj97_PM18
	1004	Tat1_BM10
	1005	Tat10_BM10
	1006	Tat101_BM10
	1007	Tat104_BM10
	1008	Tat105_BM10
	1009	Tat11_BM10
	1010	Tat110_BM10
	1011	Tat115_BM10
	1012	Tat118_BM10
	1013	Tat12_BM10
	1014	Tat125_BM10
	1015	Tat13_BM10
	1016	Tat131_BM10
	1017	Tat139_BM10
	1018	Tat14_BM10
	1019	Tat141_BM10
	1020	Tat15_BM10
	1021	Tat16_BM10
	1022	Tat17_BM10
	1023	Tat18_BM10
	1024	Tat19_BM10
	1025	Tat2_BM10
	1026	Tat21_BM10
	1027	Tat22_BM10
	1028	Tat23_BM10
	1029	Tat24_BM10
	1030	Tat25_BM10
	1031	Tat257_BM10
	1032	Tat26_BM10
	1033	Tat27_BM10
	1034	Tat28_BM10
	1035	Tat29_BM10
	1036	Tat3_BM10
	1037	Tat30_BM10
	1038	Tat31_BM10
	1039	Tat32_BM10
	1040	Tat33_BM10
	1041	Tat34_BM10
	1042	Tat36_BM10
	1043	Tat38_BM10
	1044	Tat41_BM10
	1045	Tat42_BM10
	1046	Tat43_BM10
	1047	Tat45_BM10
	1048	Tat46_BM10
	1049	Tat47_BM10
	1050	Tat48_BM10
	1051	Tat49_BM10
	1052	Tat5_BM10
	1053	Tat51_BM10
	1054	Tat52_BM10
	1055	Tat56_BM10
	1056	Tat57_BM10
	1057	Tat58_BM10
	1058	Tat6_BM10
	1059	Tat60_BM10
	1060	Tat62_BM10
	1061	Tat64_BM10
	1062	Tat65_BM10
	1063	Tat66_BM10
	1064	Tat67_BM10
	1065	Tat68_BM10
	1066	Tat69_BM10
	1067	Tat7_BM10
	1068	Tat70_BM10
	1069	Tat74_BM10
	1070	Tat8_BM10
	1071	Tat84_BM10
	1072	Tat87_BM10
	1073	Tat89_BM10
	1074	Tat9_BM10
	1075	Tat95_BM10
	1076	Tat97_BM10
	1077	Tib001_KL16
	1078	Tib002_KL16
	1079	Tib003_KL16
	1080	Tib004_KL16
	1081	Tib005_KL16
	1082	Tib006_KL16
	1083	Tib007_KL16
	1084	Tib008_KL16
	1085	Tib009_KL16
	1086	Tib010_KL16
	1087	Tib011_KL16
	1088	Tib012_KL16
	1089	Tib013_KL16
	1090	Tib014_KL16
	1091	Tib015_KL16
	1092	Tib016_KL16
	1093	Tib017_KL16
	1094	Tib018_KL16
	1095	Tib019_KL16
	1096	Tib020_KL16
	1097	Tib021_KL16
	1098	Tib022_KL16
	1099	Tib023_KL16
	1100	Tib024_KL16
	1101	Tib025_KL16
	1102	Tib026_KL16
	1103	Tib027_KL16
	1104	Tib028_KL16
	1105	Tib029_KL16
	1106	Tib030_KL16
	1107	Tib031_KL16
	1108	Tib032_KL16
	1109	Tib033_KL16
	1110	Tib034_KL16
	1111	Tib035_KL16
	1112	Tib036_KL16
	1113	Tib037_KL16
	1114	Tib038_KL16
	1115	Tib039_KL16
	1116	Tib040_KL16
	1117	Tib041_KL16
	1118	Tib042_KL16
	1119	Tib043_KL16
	1120	Tib044_KL16
	1121	Tib045_KL16
	1122	Tib047_KL16
	1123	Tib048_KL16
	1124	Tib049_KL16
	1125	Tib050_KL16
	1126	Tib051_KL16
	1127	Tib052_KL16
	1128	Tib054_KL16
	1129	Tib055_KL16
	1130	Tib056_KL16
	1131	Tib058_KL16
	1132	Tib059_KL16
	1133	Tib060_KL16
	1134	Tib061_KL16
	1135	Tib062_KL16
	1136	Tib063_KL16
	1137	Tib064_KL16
	1138	Tib065_KL16
	1139	Tib066_KL16
	1140	Tib067_KL16
	1141	Tib068_KL16
	1142	Tib069_KL16
	1143	Tib071_KL16
	1144	Tib072_KL16
	1145	Tib073_KL16
	1146	Tib074_KL16
	1147	Tib075_KL16
	1148	Tib076_KL16
	1149	Tib077_KL16
	1150	Tib078_KL16
	1151	Tib079_KL16
	1152	Tib080_KL16
	1153	Tib081_KL16
	1154	Tib082_KL16
	1155	Tib083_KL16
	1156	Tib084_KL16
	1157	Tib085_KL16
	1158	Tib086_KL16
	1159	Tib087_KL16
	1160	Tib088_KL16
	1161	Tib089_KL16
	1162	Tib090_KL16
	1163	Tib092_KL16
	1164	Tib093_KL16
	1165	Tib094_KL16
	1166	Tib095_KL16
	1167	Tib096_KL16
	1168	Tib097_KL16
	1169	Tib098_KL16
	1170	Tib099_KL16
	1171	Tib100_KL16
	1172	Tib101_KL16
	1173	Tib102_KL16
	1174	Tib103_KL16
	1175	Tib105_KL16
	1176	Tib106_KL16
	1177	Tib109_KL16
	1178	Tib110_KL16
	1179	Tib111_KL16
	1180	Tib112_KL16
	1181	Tib113_KL16
	1182	Tib114_KL16
	1183	Tib115_KL16
	1184	Tib117_KL16
	1185	Tib118_KL16
	1186	Tib119_KL16
	1187	Tib120_KL16
	1188	Tib121_KL16
	1189	Tib122_KL16
	1190	Tib124_KL16
	1191	Tib125_KL16
	1192	Tib127_KL16
	1193	Tib136_KL16
	1194	Tib137_KL16
	1195	Tib138_KL16
	1196	Tib139_KL16
	1197	Tib140_KL16
	1198	Tib141_KL16
	1199	Tib142_KL16
	1200	Tib143_KL16
	1201	Tib147_KL16
	1202	Tib154_KL16
	1203	Tib155_KL16
	1204	Tib156_KL16
	1205	Tib159_KL16
	1206	Tib160_KL16
	1207	Tib162_KL16
	1208	Tib163_KL16
	1209	Tib164_KL16
	1210	Tib166_KL16
	1211	Tib167_KL16
	1212	Tib168_KL16
	1213	Tib169_KL16
	1214	Tib170_KL16
	1215	Tib171_KL16
	1216	Tib175_KL16
	1217	Tib176_KL16
	1218	Tib177_KL16
	1219	Tib180_KL16
	1220	Tib181_KL16
	1221	Tib183_KL16
	1222	Tib184_KL16
	1223	Tib185_KL16
	1224	Tib186_KL16
	1225	Tib187_KL16
	1226	Tib188_KL16
	1227	Tib189_KL16
	1228	Tib190_KL16
	1229	Tib191_KL16
	1230	Tib192_KL16
	1231	Tib193_KL16
	1232	Tib195_KL16
	1233	Tib197_KL16
	1234	Tib198_KL16
	1235	Tib199_KL16
	1236	Tib200_KL16
	1237	Tib202_KL16
	1238	Tib203_KL16
	1239	Tib204_KL16
	1240	Tib206_KL16
	1241	Tib207_KL16
	1242	Tib208_KL16
	1243	Tib221_KL16
	1244	Tib225_KL16
	1245	Tib228_KL16
	1246	Tib232_KL16
	1247	Tib244_KL16
	1248	Tib249_KL16
	1249	Tib250_KL16
	1250	Tib251_KL16
	1251	Tib258_KL16
	1252	Tib260_KL16
	1253	Tib2713_ZM09
	1254	Tib2748_ZM09
	1255	Tib2755_ZM09
	1256	Tib2786_ZM09
	1257	Tib2798_ZM09
	1258	Tib282_KL16
	1259	Tib2831_ZM09
	1260	Tib285_KL16
	1261	Tib2866_ZM09
	1262	Tib288_KL16
	1263	Tib298_KL16
	1264	Tib315_ZM09
	1265	Tib324_KL16
	1266	Tib327_KL16
	1267	Tib328_KL16
	1268	Tib331_KL16
	1269	Tib344_KL16
	1270	Tib345_KL16
	1271	Tib346_KL16
	1272	Tib348_KL16
	1273	Tib409_ZM09
	1274	Tib412_ZM09
	1275	Tib426_ZM09
	1276	Tib44_ZM09
	1277	Tib457_ZM09
	1278	Tib470_ZM09
	1279	Tib513_ZM09
	1280	Tib52_ZM09
	1281	Tib551_ZM09
	1282	Tib570_KL16
	1283	Tib571_KL16
	1284	Tib577_KL16
	1285	Tib582_KL16
	1286	Tib583_KL16
	1287	Tib585_KL16
	1288	Tib586_KL16
	1289	Tib592_KL16
	1290	Tib593_KL16
	1291	Tib594_KL16
	1292	Tib595_KL16
	1293	Tib597_KL16
	1294	Tib598_KL16
	1295	Tib600_KL16
	1296	Tib601_KL16
	1297	Tib602_KL16
	1298	Tib606_KL16
	1299	Tib608_KL16
	1300	Tib609_KL16
	1301	Tib61_ZM09
	1302	Tib611_KL16
	1303	Tib616_ZM09
	1304	Tib67_ZM09
	1305	Tib709_ZM09
	1306	Tib722_ZM09
	1307	Tib805_ZM09
	1308	Tub1_RS12
	1309	Tub10_NV08
	1310	Tub102_RS12
	1311	Tub103_RS12
	1312	Tub13_RS12
	1313	Tub14_RS12
	1314	Tub142_RS12
	1315	Tub15_RS12
	1316	Tub17_RS12
	1317	Tub18_NV08
	1318	Tub19_NV08
	1319	Tub20_RS12
	1320	Tub21_RS12
	1321	Tub22_RS12
	1322	Tub24_RS12
	1323	Tub26_NV08
	1324	Tub26_RS12
	1325	Tub27_NV08
	1326	Tub28_NV08
	1327	Tub3_NV08
	1328	Tub30_RS12
	1329	Tub32_NV08
	1330	Tub35_NV08
	1331	Tub4_RS12
	1332	Tub41_RS12
	1333	Tub47_RS12
	1334	Tub5_RS12
	1335	Tub6_RS12
	1336	Tub7_NV08
	1337	Tub8_NV08
	1338	Tub9_RS12
	1339	TubL21_RS12
	1340	Tuv6_RS12
	1341	Uyg0001_ZH17
	1342	Uyg0002_ZH17
	1343	Uyg0005_ZH17
	1344	Uyg0009_ZH17
	1345	Uyg0011_ZH17
	1346	Uyg0012_ZH17
	1347	Uyg0015_ZH17
	1348	Uyg0017_ZH17
	1349	Uyg0018_ZH17
	1350	Uyg0019_ZH17
	1351	Uyg0020_ZH17
	1352	Uyg0021_ZH17
	1353	Uyg0024_ZH17
	1354	Uyg0030_ZH17
	1355	Uyg0031_ZH17
	1356	Uyg0032_ZH17
	1357	Uyg0033_ZH17
	1358	Uyg0044_ZH17
	1359	Uyg0065_ZH17
	1360	Uyg0066_ZH17
	1361	Uyg0068_ZH17
	1362	Uyg0069_ZH17
	1363	Uyg0070_ZH17
	1364	Uyg0074_ZH17
	1365	Uyg0077_ZH17
	1366	Uyg0078_ZH17
	1367	Uyg0079_ZH17
	1368	Uyg0080_ZH17
	1369	Uyg0083_ZH17
	1370	Uyg0084_ZH17
	1371	Uyg0092_ZH17
	1372	Uyg0095_ZH17
	1373	Uyg0096_ZH17
	1374	Uyg0099_ZH17
	1375	Uyg0101_ZH17
	1376	Uyg0103_ZH17
	1377	Uyg0106_ZH17
	1378	Uyg0109_ZH17
	1379	Uyg0110_ZH17
	1380	Uyg0114_ZH17
	1381	Uyg0118_ZH17
	1382	Uyg0119_ZH17
	1383	Uyg0124_ZH17
	1384	Uyg0125_ZH17
	1385	Uyg0130_ZH17
	1386	Uyg0135_ZH17
	1387	Uyg0145_ZH17
	1388	Uyg0148_ZH17
	1389	Uyg0150_ZH17
	1390	Uyg0151_ZH17
	1391	Uyg0154_ZH17
	1392	Uyg0156_ZH17
	1393	Uyg0159_ZH17
	1394	Uyg0160_ZH17
	1395	Uyg0161_ZH17
	1396	Uyg0164_ZH17
	1397	Uyg0165_ZH17
	1398	Uyg0167_ZH17
	1399	Uyg0169_ZH17
	1400	Uyg0171_ZH17
	1401	Uyg0172_ZH17
	1402	Uyg0174_ZH17
	1403	Uyg0175_ZH17
	1404	Uyg0178_ZH17
	1405	Uyg0179_ZH17
	1406	Uyg0180_ZH17
	1407	Uyg0182_ZH17
	1408	Uyg0183_ZH17
	1409	Uyg0184_ZH17
	1410	Uyg0185_ZH17
	1411	Uyg0188_ZH17
	1412	Uyg0191_ZH17
	1413	Uyg0193_ZH17
	1414	Uyg0194_ZH17
	1415	Uyg0196_ZH17
	1416	Uyg0200_ZH17
	1417	Uyg0201_ZH17
	1418	Uyg0204_ZH17
	1419	Uyg0208_ZH17
	1420	Uyg0210_ZH17
	1421	Uyg0213_ZH17
	1422	Uyg0214_ZH17
	1423	Uyg0217_ZH17
	1424	Uyg0218_ZH17
	1425	Uyg0219_ZH17
	1426	Uyg0222_ZH17
	1427	Uyg0224_ZH17
	1428	Uyg0226_ZH17
	1429	Uyg0230_ZH17
	1430	Uyg0233_ZH17
	1431	Uyg0234_ZH17
	1432	Uyg0236_ZH17
	1433	Uyg0238_ZH17
	1434	Uyg0240_ZH17
	1435	Uyg0243_ZH17
	1436	Uyg0244_ZH17
	1437	Uyg0253_ZH17
	1438	Uyg0255_ZH17
	1439	Uyg0263_ZH17
	1440	Uyg0275_ZH17
	1441	Uyg0281_ZH17
	1442	Uyg0284_ZH17
	1443	Uyg0288_ZH17
	1444	Uyg0289_ZH17
	1445	Uyg0290_ZH17
	1446	Uyg0293_ZH17
	1447	Uyg0298_ZH17
	1448	Uyg0299_ZH17
	1449	Uyg0300_ZH17
	1450	Uyg0302_ZH17
	1451	Uyg0304_ZH17
	1452	Uyg0305_ZH17
	1453	Uyg0307_ZH17
	1454	Uyg0308_ZH17
	1455	Uyg0310_ZH17
	1456	Uyg0311_ZH17
	1457	Uyg0312_ZH17
	1458	Uyg0314_ZH17
	1459	Uyg0315_ZH17
	1460	Uyg0316_ZH17
	1461	Uyg0317_ZH17
	1462	Uyg0318_ZH17
	1463	Uyg0319_ZH17
	1464	Uyg0320_ZH17
	1465	Uyg0324_ZH17
	1466	Uyg0325_ZH17
	1467	Uyg0327_ZH17
	1468	Uyg0330_ZH17
	1469	Uyg0342_ZH17
	1470	Uyg0345_ZH17
	1471	Uyg0347_ZH17
	1472	Uyg0352_ZH17
	1473	Uyg0354_ZH17
	1474	Uyg0357_ZH17
	1475	Uyg0361_ZH17
	1476	Uyg0364_ZH17
	1477	Uyg0365_ZH17
	1478	Uyg0366_ZH17
	1479	Uyg0369_ZH17
	1480	Uyg0370_ZH17
	1481	Uyg0372_ZH17
	1482	Uyg0373_ZH17
	1483	Uyg0375_ZH17
	1484	Uyg0379_ZH17
	1485	Uyg0380_ZH17
	1486	Uyg0382_ZH17
	1487	Uyg0387_ZH17
	1488	Uyg0388_ZH17
	1489	Uyg0390_ZH17
	1490	Uyg0392_ZH17
	1491	Uyg0395_ZH17
	1492	Uyg0397_ZH17
	1493	Uyg0398_ZH17
	1494	Uyg0399_ZH17
	1495	Uyg0400_ZH17
	1496	Uyg0402_ZH17
	1497	Uyg0403_ZH17
	1498	Uyg0404_ZH17
	1499	Uyg0437_ZH17
	1500	Uyg0443_ZH17
	1501	Uyg0444_ZH17
	1502	Uyg0447_ZH17
	1503	Uyg0449_ZH17
	1504	Uyg0450_ZH17
	1505	Uyg0451_ZH17
	1506	Uyg0453_ZH17
	1507	Uyg0454_ZH17
	1508	Uyg0455_ZH17
	1509	Uyg0456_ZH17
	1510	Uyg0457_ZH17
	1511	Uyg0458_ZH17
	1512	Uyg0460_ZH17
	1513	Uyg0461_ZH17
	1514	Uyg0462_ZH17
	1515	Uyg0464_ZH17
	1516	Uyg0465_ZH17
	1517	Uyg0466_ZH17
	1518	Uyg0468_ZH17
	1519	Uyg0469_ZH17
	1520	Uyg0471_ZH17
	1521	Uyg0473_ZH17
	1522	Uyg0474_ZH17
	1523	Uyg0476_ZH17
	1524	Uyg0477_ZH17
	1525	Uyg0478_ZH17
	1526	Uyg0479_ZH17
	1527	Uyg0480_ZH17
	1528	Uyg0483_ZH17
	1529	Uyg0487_ZH17
	1530	Uyg0488_ZH17
	1531	Uyg0490_ZH17
	1532	Uyg0491_ZH17
	1533	Uyg0492_ZH17
	1534	Uyg0493_ZH17
	1535	Uyg0496_ZH17
	1536	Uyg0497_ZH17
	1537	Uyg0499_ZH17
	1538	Uyg0500_ZH17
	1539	Uyg0501_ZH17
	1540	Uyg0503_ZH17
	1541	Uyg0504_ZH17
	1542	Uyg0506_ZH17
	1543	Uyg0508_ZH17
	1544	Uyg0509_ZH17
	1545	Uyg0510_ZH17
	1546	Uyg0519_ZH17
	1547	Uyg0520_ZH17
	1548	Uyg0521_ZH17
	1549	Uyg0522_ZH17
	1550	Uyg0523_ZH17
	1551	Uyg0525_ZH17
	1552	Uyg0526_ZH17
	1553	Uyg0527_ZH17
	1554	Uyg0532_ZH17
	1555	Uyg0534_ZH17
	1556	Uyg0535_ZH17
	1557	Uyg0537_ZH17
	1558	Uyg0539_ZH17
	1559	Uyg0540_ZH17
	1560	Uyg0544_ZH17
	1561	Uyg0545_ZH17
	1562	Uyg0546_ZH17
	1563	Uyg0547_ZH17
	1564	Uyg0548_ZH17
	1565	Uyg0549_ZH17
	1566	Uyg0550_ZH17
	1567	Uyg0552_ZH17
	1568	Uyg0553_ZH17
	1569	Uyg0560_ZH17
	1570	Uyg0561_ZH17
	1571	Uyg0562_ZH17
	1572	Uyg0564_ZH17
	1573	Uyg0568_ZH17
	1574	Uyg0569_ZH17
	1575	Uyg0571_ZH17
	1576	Uyg0572_ZH17
	1577	Uyg0573_ZH17
	1578	Uyg0574_ZH17
	1579	Uyg0575_ZH17
	1580	Uyg0577_ZH17
	1581	Uyg0578_ZH17
	1582	Uyg0580_ZH17
	1583	Uyg0581_ZH17
	1584	Uyg0582_ZH17
	1585	Uyg0585_ZH17
	1586	Uyg0589_ZH17
	1587	Uyg0590_ZH17
	1588	Uyg0591_ZH17
	1589	Uyg0595_ZH17
	1590	Uyg0596_ZH17
	1591	Uyg0598_ZH17
	1592	Uyg0599_ZH17
	1593	Uyg0601_ZH17
	1594	Uyg0602_ZH17
	1595	Uyg0605_ZH17
	1596	Uyg0606_ZH17
	1597	Uyg0607_ZH17
	1598	Uyg0608_ZH17
	1599	Uyg0610_ZH17
	1600	Uyg0612_ZH17
	1601	Uyg0614_ZH17
	1602	Uyg0615_ZH17
	1603	Uyg0618_ZH17
	1604	Uyg0620_ZH17
	1605	Uyg0621_ZH17
	1606	Uyg0623_ZH17
	1607	Uyg0624_ZH17
	1608	Uyg0625_ZH17
	1609	Uyg0626_ZH17
	1610	Uyg0627_ZH17
	1611	Uyg0629_ZH17
	1612	Uyg0630_ZH17
	1613	Uyg0631_ZH17
	1614	Uyg0633_ZH17
	1615	Uyg0634_ZH17
	1616	Uyg0636_ZH17
	1617	Uyg0638_ZH17
	1618	Uyg0644_ZH17
	1619	Uyg0645_ZH17
	1620	Uyg0647_ZH17
	1621	Uyg0648_ZH17
	1622	Uyg0650_ZH17
	1623	Uyg0651_ZH17
	1624	Uyg0653_ZH17
	1625	Uyg0655_ZH17
	1626	Uyg0657_ZH17
	1627	Uyg0658_ZH17
	1628	Uyg0660_ZH17
	1629	Uyg0661_ZH17
	1630	Uyg0662_ZH17
	1631	Uyg0663_ZH17
	1632	Uyg0664_ZH17
	1633	Uyg0666_ZH17
	1634	Uyg0668_ZH17
	1635	Uyg0669_ZH17
	1636	Uyg0670_ZH17
	1637	Uyg0671_ZH17
	1638	Uyg0672_ZH17
	1639	Uyg0673_ZH17
	1640	Uyg0677_ZH17
	1641	Uyg0678_ZH17
	1642	Uyg0679_ZH17
	1643	Uyg0680_ZH17
	1644	Uyg0681_ZH17
	1645	Uyg0682_ZH17
	1646	Uyg0684_ZH17
	1647	Uyg0688_ZH17
	1648	Uyg0689_ZH17
	1649	Uyg0690_ZH17
	1650	Uyg0692_ZH17
	1651	Uyg0695_ZH17
	1652	Uyg0697_ZH17
	1653	Uyg0698_ZH17
	1654	Uyg0700_ZH17
	1655	Uyg0701_ZH17
	1656	Uyg0703_ZH17
	1657	Uyg0705_ZH17
	1658	Uyg0706_ZH17
	1659	Uyg0708_ZH17
	1660	Uyg0709_ZH17
	1661	Uyg0712_ZH17
	1662	Uyg0713_ZH17
	1663	Uyg0715_ZH17
	1664	Uyg0716_ZH17
	1665	Uyg0717_ZH17
	1666	Uyg0718_ZH17
	1667	Uyg0719_ZH17
	1668	Uyg0720_ZH17
	1669	Uyg0725_ZH17
	1670	Uyg0726_ZH17
	1671	Uyg0727_ZH17
	1672	Uyg0731_ZH17
	1673	Uyg0732_ZH17
	1674	Uyg0733_ZH17
	1675	Uyg0734_ZH17
	1676	Uyg0736_ZH17
	1677	Uyg0738_ZH17
	1678	Uyg0739_ZH17
	1679	Uyg0740_ZH17
	1680	Uyg0741_ZH17
	1681	Uyg0742_ZH17
	1682	Uyg0744_ZH17
	1683	Uyg0746_ZH17
	1684	Uyg0752_ZH17
	1685	Uyg0754_ZH17
	1686	Uyg0755_ZH17
	1687	Uyg0756_ZH17
	1688	Uyg0757_ZH17
	1689	Uyg0759_ZH17
	1690	Uyg0760_ZH17
	1691	Uyg0761_ZH17
	1692	Uyg0764_ZH17
	1693	Uyg0765_ZH17
	1694	Uyg0766_ZH17
	1695	Uyg0767_ZH17
	1696	Uyg0770_ZH17
	1697	Uyg0771_ZH17
	1698	Uyg0772_ZH17
	1699	Uyg0773_ZH17
	1700	Uyg0776_ZH17
	1701	Uyg0777_ZH17
	1702	Uyg0778_ZH17
	1703	Uyg0779_ZH17
	1704	Uyg0864_ZH17
	1705	Uyg0866_ZH17
	1706	Uyg0869_ZH17
	1707	Uyg0871_ZH17
	1708	Uyg0874_ZH17
	1709	Uyg0877_ZH17
	1710	Uyg0878_ZH17
	1711	Uyg0882_ZH17
	1712	Uyg0883_ZH17
	1713	Uyg0884_ZH17
	1714	Uyg0886_ZH17
	1715	Uyg0887_ZH17
	1716	Uyg0888_ZH17
	1717	Uyg0889_ZH17
	1718	Uyg0890_ZH17
	1719	Uyg0891_ZH17
	1720	Uyg0905_ZH17
	1721	Uyg0906_ZH17
	1722	Uyg0909_ZH17
	1723	Uyg0910_ZH17
	1724	Uyg0912_ZH17
	1725	Uyg0914_ZH17
	1726	Uyg0915_ZH17
	1727	Uyg0919_ZH17
	1728	Uyg0920_ZH17
	1729	Uyg0921_ZH17
	1730	Uyg0923_ZH17
	1731	Uyg0924_ZH17
	1732	Uyg0926_ZH17
	1733	Uyg0927_ZH17
	1734	Uyg0928_ZH17
	1735	Uyg0931_ZH17
	1736	Uyg0932_ZH17
	1737	Uyg0936_ZH17
	1738	Uyg0937_ZH17
	1739	Uyg0938_ZH17
	1740	Uyg0939_ZH17
	1741	Uyg0940_ZH17
	1742	Uyg0941_ZH17
	1743	Uyg0942_ZH17
	1744	Uyg0943_ZH17
	1745	Uyg0944_ZH17
	1746	Uyg0947_ZH17
	1747	Uyg0948_ZH17
	1748	Uyg0956_ZH17
	1749	Uyg0957_ZH17
	1750	Uyg0959_ZH17
	1751	Uyg0962_ZH17
	1752	Uyg0964_ZH17
	1753	Uyg0965_ZH17
	1754	Uyg0966_ZH17
	1755	Uyg0967_ZH17
	1756	Uyg0969_ZH17
	1757	Uyg0970_ZH17
	1758	Uyg0971_ZH17
	1759	Uyg0975_ZH17
	1760	Uyg0979_ZH17
	1761	Uyg0981_ZH17
	1762	Uyg0986_ZH17
	1763	Uyg0988_ZH17
	1764	Uyg0994_ZH17
	1765	Uyg0995_ZH17
	1766	Uyg0996_ZH17
	1767	Uyg0997_ZH17
	1768	Uyg0999_ZH17
	1769	Uyg1000_ZH17
	1770	Uyg1002_ZH17
	1771	Uyg1003_ZH17
	1772	Uyg1005_ZH17
	1773	Uyg1009_ZH17
	1774	Uyg1010_ZH17
	1775	Uyg1015_ZH17
	1776	Uyg1017_ZH17
	1777	Uyg1019_ZH17
	1778	Uyg1020_ZH17
	1779	Uyg1021_ZH17
	1780	Uyg1022_ZH17
	1781	Uyg1023_ZH17
	1782	Uyg1024_ZH17
	1783	Uyg1027_ZH17
	1784	Uyg1029_ZH17
	1785	Uyg1033_ZH17
	1786	Uyg1034_ZH17
	1787	Uyg1035_ZH17
	1788	Uyg1038_ZH17
	1789	Uyg1040_ZH17
	1790	Uyg1041_ZH17
	1791	Uyg1042_ZH17
	1792	Uyg1044_ZH17
	1793	Uyg1045_ZH17
	1794	Uyg1046_ZH17
	1795	Uyg1049_ZH17
	1796	Uyg1050_ZH17
	1797	Uyg1054_ZH17
	1798	Uyg1057_ZH17
	1799	Uyg1060_ZH17
	1800	Uyg1061_ZH17
	1801	Uyg1062_ZH17
	1802	Uyg1064_ZH17
	1803	Uyg1065_ZH17
	1804	Uyg1066_ZH17
	1805	Uyg1068_ZH17
	1806	Uyg1070_ZH17
	1807	Uyg1071_ZH17
	1808	Uyg1074_ZH17
	1809	Uyg1075_ZH17
	1810	Uyg1076_ZH17
	1811	Uyg1081_ZH17
	1812	Uyg1082_ZH17
	1813	Uyg1084_ZH17
	1814	Uyg1086_ZH17
	1815	Uyg1088_ZH17
	1816	Uyg1090_ZH17
	1817	Uyg1096_ZH17
	1818	Uyg1098_ZH17
	1819	Uyg1099_ZH17
	1820	Uyg1100_ZH17
	1821	Uyg1101_ZH17
	1822	Uyg1105_ZH17
	1823	Uyg1106_ZH17
	1824	Uyg1107_ZH17
	1825	Uyg1108_ZH17
	1826	Uyg1114_ZH17
	1827	Uyg1115_ZH17
	1828	Uyg1116_ZH17
	1829	Uyg1117_ZH17
	1830	Uyg1118_ZH17
	1831	Uyg1123_ZH17
	1832	Uyg1124_ZH17
	1833	Uyg1127_ZH17
	1834	Uyg1128_ZH17
	1835	Uyg1129_ZH17
	1836	Uyg1131_ZH17
	1837	Uyg1132_ZH17
	1838	Uyg1133_ZH17
	1839	Uyg1135_ZH17
	1840	Uyg1137_ZH17
	1841	Uyg1138_ZH17
	1842	Uyg1139_ZH17
	1843	Uyg1143_ZH17
	1844	Uyg1145_ZH17
	1845	Uyg1151_ZH17
	1846	Uyg1152_ZH17
	1847	Uyg1153_ZH17
	1848	Uyg1154_ZH17
	1849	Uyg1155_ZH17
	1850	Uyg1156_ZH17
	1851	Uyg1159_ZH17
	1852	Uyg1160_ZH17
	1853	Uyg1161_ZH17
	1854	Uyg1163_ZH17
	1855	Uyg1164_ZH17
	1856	Uyg1166_ZH17
	1857	Uyg1167_ZH17
	1858	Uyg1169_ZH17
	1859	Uyg1172_ZH17
	1860	Uyg1175_ZH17
	1861	Uyg1176_ZH17
	1862	Uyg1177_ZH17
	1863	Uyg1178_ZH17
	1864	Uyg1182_ZH17
	1865	Uyg1183_ZH17
	1866	Uyg1184_ZH17
	1867	Uyg1185_ZH17
	1868	Uyg1187_ZH17
	1869	Uyg1189_ZH17
	1870	Uyg1191_ZH17
	1871	Uyg1192_ZH17
	1872	Uyg1193_ZH17
	1873	Uyg1194_ZH17
	1874	Uyg1195_ZH17
	1875	Uyg1196_ZH17
	1876	Uyg1197_ZH17
	1877	Uyg1198_ZH17
	1878	Uyg1200_ZH17
	1879	Uyg1203_ZH17
	1880	Uyg1204_ZH17
	1881	Uyg1206_ZH17
	1882	Uyg1208_ZH17
	1883	Uyg1209_ZH17
	1884	Uyg1211_ZH17
	1885	Uyg1213_ZH17
	1886	Uyg1214_ZH17
	1887	Uyg1215_ZH17
	1888	Uyg1217_ZH17
	1889	Uyg1219_ZH17
	1890	Uyg1220_ZH17
	1891	Uyg1221_ZH17
	1892	Uyg1224_ZH17
	1893	Uyg1225_ZH17
	1894	Uyg1228_ZH17
	1895	Uyg1229_ZH17
	1896	Uyg1230_ZH17
	1897	Uyg1231_ZH17
	1898	Uyg1234_ZH17
	1899	Uyg1235_ZH17
	1900	Uyg1236_ZH17
	1901	Uyg1237_ZH17
	1902	Uyg1238_ZH17
	1903	Uyg1239_ZH17
	1904	Uyg1240_ZH17
	1905	Uyg1242_ZH17
	1906	Uyg1244_ZH17
	1907	Uyg1245_ZH17
	1908	Uyg1247_ZH17
	1909	Uyg1248_ZH17
	1910	Uyg1250_ZH17
	1911	Uyg1252_ZH17
	1912	Uyg1256_ZH17
	1913	Uyg1257_ZH17
	1914	Uyg1261_ZH17
	1915	Uyg1264_ZH17
	1916	Uyg1265_ZH17
	1917	Uyg1267_ZH17
	1918	Uyg1268_ZH17
	1919	Uyg1271_ZH17
	1920	Uyg1275_ZH17
	1921	Uyg1276_ZH17
	1922	Uyg1277_ZH17
	1923	Uyg1278_ZH17
	1924	Uyg1279_ZH17
	1925	Uyg1281_ZH17
	1926	Uyg1285_ZH17
	1927	Uyg1290_ZH17
	1928	Uyg1292_ZH17
	1929	Uyg1296_ZH17
	1930	Uyg1297_ZH17
	1931	Uyg1300_ZH17
	1932	Uyg1304_ZH17
	1933	Uyg1305_ZH17
	1934	Uyg1309_ZH17
	1935	Uyg1310_ZH17
	1936	Uyg1311_ZH17
	1937	Uyg1314_ZH17
	1938	Uyg1315_ZH17
	1939	Uyg1317_ZH17
	1940	Uyg1318_ZH17
	1941	Uyg1319_ZH17
	1942	Uyg1320_ZH17
	1943	Uyg1322_ZH17
	1944	Uyg1325_ZH17
	1945	Uyg1329_ZH17
	1946	Uyg1330_ZH17
	1947	Uyg1331_ZH17
	1948	Uyg1333_ZH17
	1949	Uyg1335_ZH17
	1950	Uyg1336_ZH17
	1951	Uyg1340_ZH17
	1952	Uyg1341_ZH17
	1953	Uyg1342_ZH17
	1954	Uyg1343_ZH17
	1955	Uyg1344_ZH17
	1956	Uyg1346_ZH17
	1957	Uyg1347_ZH17
	1958	Uyg1348_ZH17
	1959	Uyg1351_ZH17
	1960	Uyg1352_ZH17
	1961	Uyg1355_ZH17
	1962	Uyg1356_ZH17
	1963	Uyg1357_ZH17
	1964	Uyg1358_ZH17
	1965	Uyg1359_ZH17
	1966	Uyg1360_ZH17
	1967	Uyg1361_ZH17
	1968	Uyg1363_ZH17
	1969	Uyg1364_ZH17
	1970	Uyg1365_ZH17
	1971	Uyg1367_ZH17
	1972	Uyg1368_ZH17
	1973	Uyg1369_ZH17
	1974	Uyg1370_ZH17
	1975	Uyg1371_ZH17
	1976	Uyg1372_ZH17
	1977	Uyg1373_ZH17
	1978	Uyg1374_ZH17
	1979	Uyg1375_ZH17
	1980	Uyg1376_ZH17
	1981	Uyg1378_ZH17
	1982	Uyg1379_ZH17
	1983	Uyg1380_ZH17
	1984	Uyg1384_ZH17
	1985	Uyg1385_ZH17
	1986	Uyg1386_ZH17
	1987	Uyg1388_ZH17
	1988	Uyg1390_ZH17
	1989	Uyg1393_ZH17
	1990	Uyg1395_ZH17
	1991	Uyg1396_ZH17
	1992	Uyg1397_ZH17
	1993	Uyg1398_ZH17
	1994	Uyg1399_ZH17
	1995	Uyg1401_ZH17
	1996	Uyg1402_ZH17
	1997	Uyg1403_ZH17
	1998	Uyg1404_ZH17
[truncated: 76 more rows]
